# Supplementary material for: Assessing the Efficacy of A Mo2C/Peroxydisulfate System for Tertiary Wastewater Treatment: A Study of Losartan Degradation, E. coli Inactivation, and Synergistic Effects
Source: MDPI journal article supplement (doi:10.3390/catal13091285), 2023-09-08
Supplement: s1 [file s1]

# Assessing the Efficacy of A Mo<sub>2</sub>C/Peroxydisulfate System for Tertiary Wastewater Treatment: A Study of Losartan Degradation, *E. coli* Inactivation, and Synergistic Effects

Alexandra A. Ioannidi <sup>1</sup>, Maria Vlachodimitropoulou <sup>1</sup>, Zacharias Frontistis <sup>2</sup>, Athanasia Petala <sup>3</sup>, Eleni Koutra <sup>1</sup>, Michael Kornaros <sup>1</sup> and Dionissios Mantzavinos <sup>1,\*</sup>

<sup>1</sup> Department of Chemical Engineering, University of Patras, GR-26504 Patras, Greece; alex.ioannidi@chemeng.upatras.gr (A.A.I.); m.vlachodimitropoulou@gmail.com (M.V.); ekoutra@chemeng.upatras.gr (E.K.); kornaros@chemeng.upatras.gr (M.K.)

<sup>2</sup> Department of Chemical Engineering, University of Western Macedonia, GR-50132 Kozani, Greece; zfrontistis@uowm.gr

<sup>3</sup> Department of Environment, Ionian University, GR-29100 Zakynthos, Greece; apetala@ionio.gr

\* Correspondence: mantzavinos@chemeng.upatras.gr

## Supporting Information

**Table S1.** Main properties of various water matrices used in this study.

| Water matrix (abbreviation) | Characteristics                                                                                                                                                                                                  | Source                                                                         |
|-----------------------------|------------------------------------------------------------------------------------------------------------------------------------------------------------------------------------------------------------------|--------------------------------------------------------------------------------|
| Ultrapure water (UPW)       | 18.2 MΩ cm at 25 °C, and pH ≈ 5.5                                                                                                                                                                                | Millipore Direct-Q UV, Bedford, MA, USA                                        |
| Bottled water (BW)          | pH= 7.7, TOC= 0.32 mg/L, conductivity= 356 μS/cm, bicarbonate= 237.9 mg/L, chloride= 3.84 mg/L, sulfate= 7.92 mg/L, nitrate= 1.1 mg/L, Ca <sup>2+</sup> =75.5 mg/L, total hardness (CaCO <sub>3</sub> )=210 mg/L | Commercially available                                                         |
| Wastewater (WW)             | pH=8.5, COD= 3.8 mg/L, conductivity= 283 μS/cm, chloride= 1 mg/L, nitrate= 0.9 mg/L, sulfate=8.0 mg/L, NH <sub>3</sub> < 1 mg/L, total suspended solids=17 mg/L, and volatile suspended solids=7 mg/L            | Secondary effluent from University of Patras campus wastewater treatment plant |

## Experimental procedure of disinfection

The bacteria were cultured in a Luria-Bertani (LB) nutrient solution at 37 °C for 24 h [65]. Then agar-based nutrient medium (LB) in petri plates was inoculated with the liquid culture at different dilutions and they were incubated at 37 °C for 24 h [66].

Bacterial cultures growing on the solid medium were used to inoculate the 0.8% w/v NaCl aqueous solution until the initial concentration was  $\approx 108$  CFU/ml (ABS = 0.1 at 600 nm). Every time an inactivation experiment took place, a fresh solid culture was used. The estimation of initial *E. coli* concentration in the 0.8% w/v NaCl aqueous solution was carried out photometrically, based on the McFarland scale. The optical density of *E. coli* was measured at 600 nm (Hach Lange DR5000 UV/VIS Spectrophotometer). Plate counts were performed on solid medium for credible measurements of bacterial density (CFU/mL) [67].

Specifically, the experimental procedure is as follows; 50 mL 0.8% w/v NaCl was inoculated with a fresh solid culture until the optical density reach 0.1 at 600 nm. Then 1 mL of *E. coli* and the desirable amount of LOS stock solution were added in 100 mL reactor volume in order the initial concentration of *E. coli* and LOS to be  $\approx 10^6$ – $10^7$  CFU/mL and 500  $\mu\text{g/L}$ , respectively. Furthermore, the addition of 250 mg/L SPS and 500 mg/L  $\text{Mo}_2\text{C}$  was simultaneous. The experiments were performed under continuous stirring, at inherent pH  $\approx 5.5$  (presence of  $\text{Mo}_2\text{C}$ ) and room temperature.

During the reaction, two samples of 1.2 mL of the reactor were taken out at regular intervals. One sample was taken to monitor LOS concentration and the other one was taken and diluted with 0.8% w/v NaCl, and then 100  $\mu\text{L}$  solution was evenly spaced on solid medium plate and placed into the incubator at 37 °C for 18–24 h. Every dilution was plated in triplicate and all experiments were conducted in duplicate.

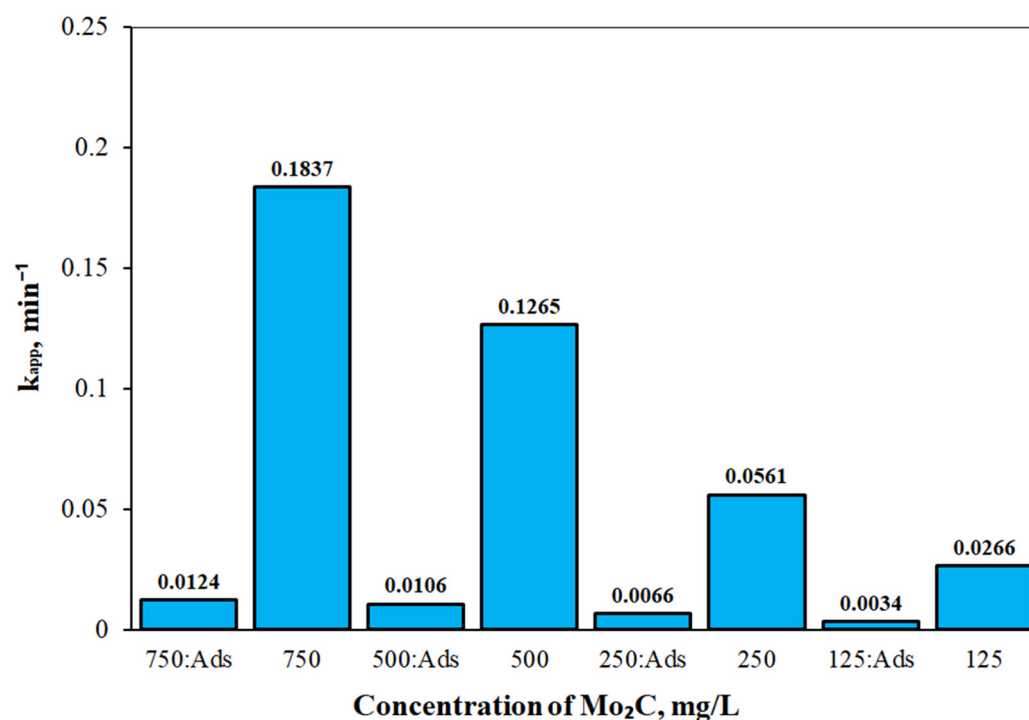

**Figure S1.** Apparent rate constants at several initial concentrations of  $\text{Mo}_2\text{C}$  for LOS degradation and adsorption in UPW. Experimental conditions: [LOS] = 500  $\mu\text{g/L}$  and [SPS] = 250 mg/L.

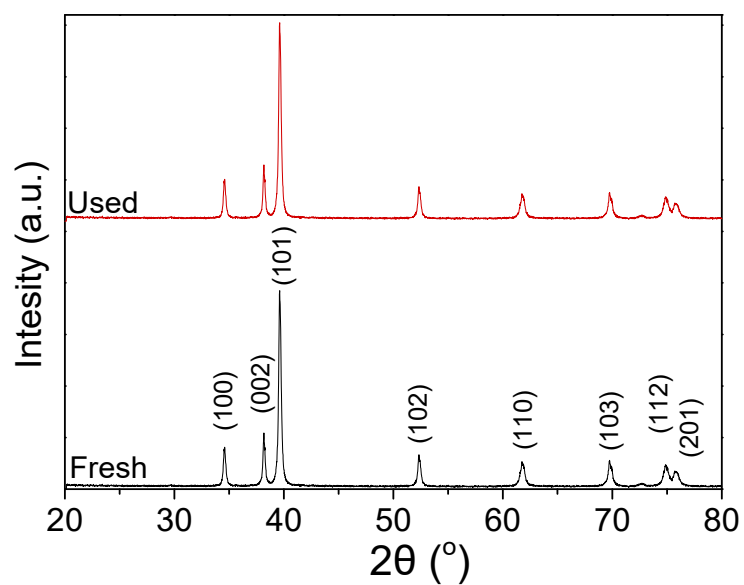

**Figure S2.** XRD patterns of “fresh”  $\text{Mo}_2\text{C}$  and after exposure to reaction conditions for 225 min (500 mg/L  $\text{Mo}_2\text{C}$ , 250 mg/L SPS, and 500  $\mu\text{g/L}$  LOS).

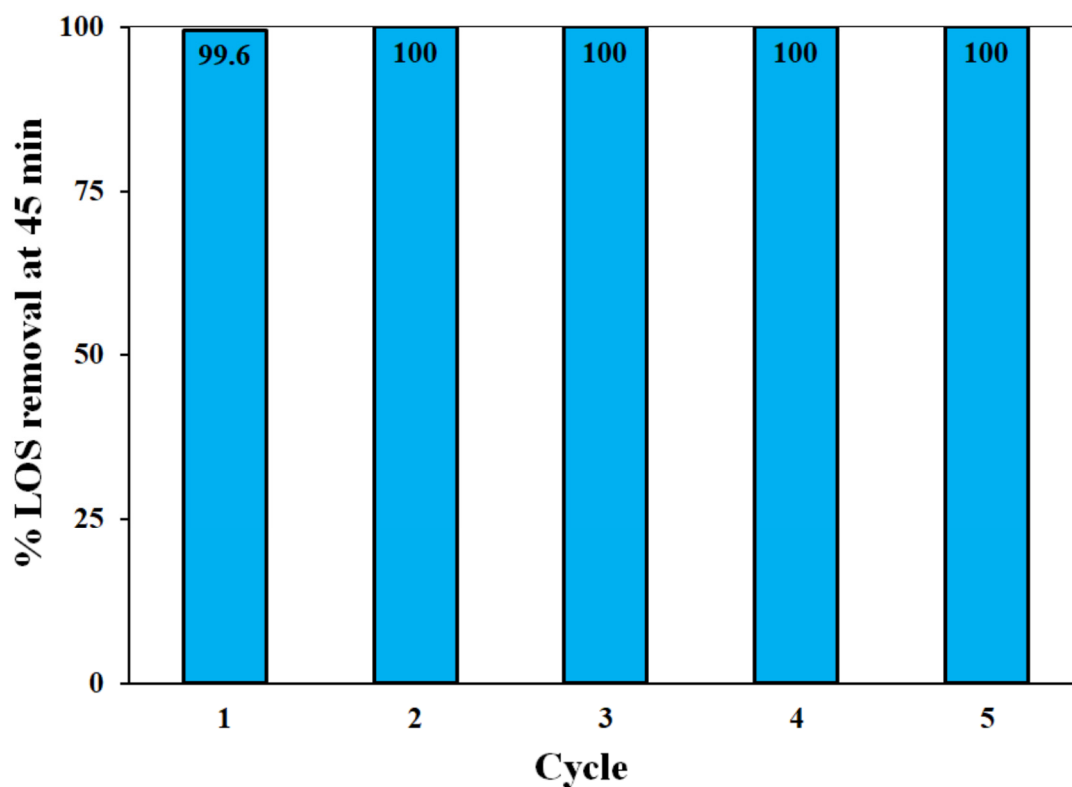

**Figure S3.** Repeated experiments of LOS removal with  $\text{Mo}_2\text{C}$  in UPW. Experimental conditions:  $[\text{Mo}_2\text{C}] = 500 \text{ mg/L}$ ,  $[\text{SPS}] = 250 \text{ mg/L}$ , and  $[\text{LOS}] = 500 \mu\text{g/L}$  at inherent  $\text{Ph} \approx 5.5$ .
