# Supplementary material for: Assessing the Efficacy of A Mo2C/Peroxydisulfate System for Tertiary Wastewater Treatment: A Study of Losartan Degradation, E. coli Inactivation, and Synergistic Effects
Source: MDPI journal article supplement (doi:10.3390/catal13091285), 2023-09-08
Supplement: s1 [file s1]

Archive with 1 entries (1 files):
- catalysts-2577616-supplementary.pdf
